# Supplementary material
Source: PubMed Central journal article supplement (PMC4536809)
Supplement: NIHMS701614-supplement-Sup.pdf [file NIHMS701614-supplement-Sup.pdf]

## Supplemental Information

**SUPPLEMENTAL TABLE 3** Cancer Incidence Rates and APC of Rates in Children and Adolescents (Ages 0–19 Years) by Race/Ethnicity, United States, 2001–2009

| ICCC Group                                                       | Non-Hispanic White |                   |                           | Non-Hispanic Black |                   |                               | Hispanic |                   |                               |
|------------------------------------------------------------------|--------------------|-------------------|---------------------------|--------------------|-------------------|-------------------------------|----------|-------------------|-------------------------------|
|                                                                  | Count              | Rate <sup>a</sup> | APC <sup>b</sup> (95% CI) | Count              | Rate <sup>a</sup> | APC <sup>b</sup> (95% CI)     | Count    | Rate <sup>a</sup> | APC <sup>b</sup> (95% CI)     |
| All ICCC groups combined                                         | 74 965             | 180.03            | 0.0 (–0.5 to 0.5)         | 13 180             | 130.08            | 1.5 (0.3 to 2.7) <sup>c</sup> | 24 421   | 168.94            | 0.6 (0.0 to 1.3)              |
| I Leukemias, myeloproliferative, myelodysplastic diseases        | 18 364             | 44.89             | –0.2 (–1.1 to 0.7)        | 2854               | 28.28             | 1.4 (–0.2 to 3.0)             | 8433     | 56.62             | 1.3 (0.1 to 2.6) <sup>c</sup> |
| I(a) Lymphoid leukemias                                          | 13 291             | 32.69             | –0.1 (–1.2 to 0.9)        | 1707               | 16.99             | 2.0 (–0.4 to 4.5)             | 6326     | 42.25             | 1.6 (0.1 to 3.1) <sup>c</sup> |
| I(b) Acute myeloid leukemias                                     | 3149               | 7.58              | –0.8 (–2.3 to 0.8)        | 735                | 7.25              | –0.3 (–5.3 to 4.9)            | 1272     | 8.72              | 0.2 (–1.7 to 2.1)             |
| I(c) Chronic myeloproliferative diseases                         | 864                | 2.04              | 0.7 (–1.7 to 3.2)         | 202                | 1.97              | —                             | 360      | 2.51              | 1.9 (–4.7 to 9.0)             |
| I(d) Myelodysplastic syndrome, other myeloproliferative          | 614                | 1.49              | 0.0 (–5.8 to 6.2)         | 119                | 1.17              | —                             | 228      | 1.49              | –2.0 (–6.5 to 2.8)            |
| I(e) Unspecified and other specified leukemias                   | 446                | 1.08              | –0.7 (–4.9 to 3.7)        | 91                 | 0.90              | —                             | 247      | 1.65              | 3.0 (–2.5 to 8.8)             |
| II Lymphomas and reticuloendothelial neoplasms                   | 11 198             | 26.28             | 0.5 (–0.3 to 1.3)         | 2223               | 21.76             | 2.4 (–0.3 to 5.2)             | 3020     | 22.23             | –0.9 (–1.9 to 0.2)            |
| II(a) Hodgkin's lymphomas                                        | 5921               | 13.68             | 0.3 (–0.5 to 1.2)         | 1031               | 10.05             | 3.2 (0.4 to 6.1) <sup>c</sup> | 1420     | 10.83             | –0.2 (–2.5 to 2.1)            |
| II(b) Non-Hodgkin's lymphomas (except Burkitt lymphoma)          | 3600               | 8.53              | 0.4 (–1.0 to 1.7)         | 939                | 9.20              | 1.1 (–2.6 to 4.9)             | 1089     | 7.99              | –0.2 (–3.0 to 2.6)            |
| II(c) Burkitt lymphoma                                           | 1202               | 2.91              | 0.4 (–2.9 to 3.8)         | 161                | 1.60              | —                             | 252      | 1.77              | 5.6 (–13.1 to 2.6)            |
| II(d) Miscellaneous lymphoreticular neoplasms                    | 348                | 0.86              | 5.3 (–0.3 to 11.2)        | 51                 | 0.51              | —                             | 202      | 1.22              | —                             |
| II(e) Unspecified lymphomas                                      | 127                | 0.30              | —                         | 41                 | 0.40              | —                             | 57       | 0.41              | —                             |
| III CNS and miscellaneous intracranial and intraspinal neoplasms | 13 858             | 33.78             | 0.0 (–1.2 to 1.3)         | 2338               | 23.27             | 1.1 (–1.0 to 3.2)             | 3719     | 25.22             | –1.0 (–2.6 to 0.6)            |
| III(a) Ependymomas and choroid plexus tumor                      | 1091               | 2.66              | –1.4 (–4.6 to 1.9)        | 199                | 1.98              | –1.7 (–9.1 to 6.2)            | 407      | 2.68              | –2.3 (–6.5 to 2.2)            |
| III(b) Astrocytomas                                              | 7162               | 17.41             | –0.1 (–1.5 to 1.3)        | 1116               | 11.09             | 2.1 (–1.6 to 6.1)             | 1673     | 11.53             | –0.5 (–2.8 to 1.9)            |
| III(c) Intracranial and intraspinal embryonal tumors             | 2809               | 6.92              | –0.1 (–2.2 to 2.1)        | 417                | 4.16              | –1.4 (–3.4 to 0.6)            | 875      | 5.76              | –2.1 (–5.2 to 1.1)            |
| III(d) Other gliomas                                             | 2356               | 5.72              | 1.2 (–0.7 to 3.1)         | 439                | 4.39              | 2.1 (–1.8 to 6.2)             | 628      | 4.32              | –1.4 (–6.5 to 4.0)            |
| III(e) Other specified intracranial/intraspinal neoplasms        | 251                | 0.61              | –3.3 (–8.9 to 2.7)        | 117                | 1.16              | —                             | 73       | 0.50              | —                             |
| III(f) Unspecified intracranial and intraspinal neoplasms        | 189                | 0.46              | —                         | 50                 | 0.49              | —                             | 63       | 0.43              | —                             |
| IV Neuroblastoma, other peripheral nervous cell tumors           | 3893               | 9.70              | –0.9 (–2.8 to 1.0)        | 719                | 7.15              | 1.3 (–2.8 to 5.5)             | 920      | 5.40              | –2.3 (–6.0 to 1.4)            |
| IV(a) Neuroblastoma and ganglioneuroblastoma                     | 3807               | 9.49              | –1.0 (–2.8 to 0.9)        | 698                | 6.95              | 1.3 (–2.5 to 5.2)             | 893      | 5.21              | –2.9 (–6.5 to 0.9)            |
| IV(b) Other peripheral nervous cell tumors                       | 86                 | 0.20              | —                         | 21                 | 0.21              | —                             | 27       | 0.19              | —                             |
| V Retinoblastoma                                                 | 1034               | 2.58              | –0.6 (–2.3 to 1.1)        | 359                | 3.55              | –0.1 (–3.0 to 2.8)            | 600      | 3.43              | –0.7 (–5.2 to 3.9)            |
| VI Renal tumors                                                  | 2778               | 6.90              | –0.1 (–1.6 to 1.5)        | 831                | 8.30              | 2.9 (1.8 to 4.0) <sup>c</sup> | 825      | 5.05              | 0.5 (–3.0 to 4.0)             |
| VI(a) Nephroblastoma, other nonepithelial renal tumors           | 2548               | 6.36              | –0.3 (–1.7 to 1.1)        | 706                | 7.08              | 2.8 (1.5 to 4.0) <sup>c</sup> | 763      | 4.58              | –0.1 (–3.6 to 3.6)            |
| VI(b) Renal carcinomas                                           | 215                | 0.50              | 3.6 (–2.5 to 10.1)        | 121                | 1.18              | —                             | 59       | 0.45              | —                             |
| VI(c) Unspecified malignant renal tumors                         | —                  | —                 | —                         | —                  | —                 | —                             | —        | —                 | —                             |
| VII Hepatic tumors                                               | 826                | 2.02              | 1.0 (–1.8 to 3.8)         | 150                | 1.48              | —                             | 363      | 2.25              | 3.5 (–5.6 to 13.4)            |
| VII(a) Hepatoblastoma                                            | 592                | 1.48              | 0.7 (–2.6 to 4.1)         | 94                 | 0.93              | —                             | 274      | 1.59              | 3.1 (–6.5 to 13.7)            |
| VII(b) Hepatic carcinomas                                        | 224                | 0.52              | 1.8 (–3.7 to 7.5)         | 55                 | 0.54              | —                             | 87       | 0.65              | —                             |
| VII(c) Unspecified malignant hepatic tumors                      | —                  | —                 | —                         | —                  | —                 | —                             | —        | —                 | —                             |
| VIII Malignant bone tumors                                       | 3931               | 9.28              | –1.0 (–2.2 to 0.2)        | 752                | 7.37              | –0.9 (–4.8 to 3.3)            | 1255     | 9.49              | 0.5 (–1.7 to 2.7)             |
| VIII(a) Osteosarcomas                                            | 1967               | 4.63              | –0.7 (–2.6 to 1.3)        | 601                | 5.89              | –1.1 (–6.0 to 4.1)            | 770      | 5.87              | 0.8 (–1.7 to 3.7)             |

**SUPPLEMENTAL TABLE 3** Continued

| ICCC Group                                             | Non-Hispanic White |                   |                                  | Non-Hispanic Black |                   |                                | Hispanic |                   |                                   |
|--------------------------------------------------------|--------------------|-------------------|----------------------------------|--------------------|-------------------|--------------------------------|----------|-------------------|-----------------------------------|
|                                                        | Count              | Rate <sup>a</sup> | APC <sup>b</sup> (95% CI)        | Count              | Rate <sup>a</sup> | APC <sup>b</sup> (95% CI)      | Count    | Rate <sup>a</sup> | APC <sup>b</sup> (95% CI)         |
| VIII(b) Chondrosarcomas                                | 172                | 0.40              | —                                | 23                 | 0.22              | —                              | 38       | 0.29              | —                                 |
| VIII(c) Ewing tumor and related sarcomas of bone       | 1544               | 3.67              | -1.5 (-3.7 to 0.7)               | 65                 | 0.64              | —                              | 349      | 2.60              | 0.7 (-3.2 to 4.7)                 |
| VIII(d) Other specified malignant bone tumors          | 179                | 0.42              | —                                | 39                 | 0.38              | —                              | 60       | 0.45              | —                                 |
| VIII(e) Unspecified malignant bone tumors              | 69                 | 0.16              | —                                | 24                 | 0.24              | —                              | 38       | 0.28              | —                                 |
| IX Soft tissue and other extraosseous sarcomas         | 5027               | 12.04             | 0.0 (-0.8 to 0.7)                | 1307               | 12.85             | 1.9 (-0.1 to 3.9)              | 1628     | 11.49             | -0.2 (-2.2 to 1.8)                |
| IX(a) Rhabdomyosarcomas                                | 1987               | 4.84              | -2.3 (-4.7 to 0.2)               | 508                | 5.04              | 3.0 (-1.8 to 7.9)              | 654      | 4.42              | 0.2 (-4.7 to 5.4)                 |
| IX(b) Fibrosarcomas, peripheral nerve, other fibrous   | 555                | 1.32              | 2.2 (-1.7 to 6.5)                | 149                | 1.46              | —                              | 198      | 1.40              | -6.7 (-10.9 to -2.3) <sup>c</sup> |
| IX(c) Kaposi sarcoma                                   | —                  | —                 | —                                | —                  | —                 | —                              | —        | —                 | —                                 |
| IX(d) Other specified soft tissue sarcomas             | 1977               | 4.67              | 0.9 (-1.5 to 3.3)                | 504                | 4.93              | 1.4 (-2.2 to 5.1)              | 616      | 4.53              | 0.6 (-2.3 to 3.7)                 |
| IX(e) Unspecified soft tissue sarcomas                 | 501                | 1.19              | 3.1 (-1.3 to 7.7)                | 134                | 1.31              | —                              | 156      | 1.11              | —                                 |
| X Germ cell, trophoblastic tumors, neoplasms of gonads | 4744               | 11.03             | 0.1 (-1.6 to 1.7)                | 634                | 6.18              | 1.5 (-0.1 to 3.0)              | 1900     | 14.26             | 1.8 (-0.6 to 3.8)                 |
| X(a) Intracranial and intraspinal germ cell tumors     | 669                | 1.59              | 0.9 (-3.1 to 5.0)                | 97                 | 0.95              | —                              | 243      | 1.81              | -0.3 (-4.8 to 4.4)                |
| X(b) Extracranial and extragonadal germ cell tumors    | 551                | 1.35              | -0.6 (-4.9 to 3.8)               | 148                | 1.45              | —                              | 246      | 1.66              | -4.5 (-7.8 to -1.2) <sup>c</sup>  |
| X(c) Malignant gonadal germ cell tumors                | 3223               | 7.40              | 0.1 (-1.7 to 1.8)                | 331                | 3.22              | 3.5 (-0.8 to 8.0)              | 1304     | 9.96              | 2.5 (-0.7 to 5.8)                 |
| X(d) Gonadal carcinomas                                | 179                | 0.41              | 2.0 (-2.4 to 6.5)                | 16                 | 0.16              | —                              | 65       | 0.51              | —                                 |
| X(e) Other and unspecified malignant gonadal tumors    | 122                | 0.28              | —                                | 42                 | 0.41              | —                              | 42       | 0.32              | —                                 |
| XI Other malignant epithelial neoplasms and melanomas  | 8984               | 20.74             | 0.3 (-0.1 to 1.6)                | 934                | 9.09              | 1.4 (-2.9 to 5.9)              | 1639     | 12.67             | 4.5 (2.7 to 7.1) <sup>c</sup>     |
| XI(a) Adrenocortical carcinomas                        | 100                | 0.24              | —                                | —                  | —                 | —                              | 30       | 0.20              | —                                 |
| XI(b) Thyroid carcinomas                               | 3393               | 7.81              | 4.0 (1.9 to 6.2) <sup>c</sup>    | 243                | 2.36              | 6.8 (0.7 to 13.2) <sup>c</sup> | 838      | 6.53              | 9.1 (5.4 to 12.8) <sup>c</sup>    |
| XI(c) Nasopharyngeal carcinomas                        | 141                | 0.33              | —                                | 176                | 1.71              | —                              | 61       | 0.48              | —                                 |
| XI(d) Malignant melanomas                              | 3499               | 8.08              | -3.5 (-6.3 to -0.5) <sup>c</sup> | 52                 | 0.51              | —                              | 218      | 1.64              | -2.0 (-5.7 to 1.9)                |
| XI(e) Skin carcinomas                                  | 38                 | 0.09              | —                                | —                  | —                 | —                              | —        | —                 | —                                 |
| XI(f) Other and unspecified carcinomas                 | 1813               | 4.19              | 1.0 (-0.3 to 2.2)                | 447                | 4.35              | -0.6 (-4.5 to 3.4)             | 485      | 3.78              | 1.1 (-1.9 to 4.1)                 |
| XII Other and unspecified malignant neoplasms          | 328                | 0.78              | -1.3 (-5.6 to 3.2)               | 79                 | 0.77              | —                              | 119      | 0.83              | —                                 |

<sup>a</sup> Rates are per million and were age-adjusted to the 2000 US standard population (19 age groups, Census P25-1130) standard. Rate statistics were not displayed if case count was < 16 cases.

<sup>b</sup> APCs were calculated by using weighted least squares method. Statistical significance was determined if the 95% CI of APC did not include zero ( $P < .05$ ). APC was not calculated if case count was < 16 cases in any 1 year. Some significant values appear to include zero because APC was rounded to the nearest 10th.

<sup>c</sup> Denotes significant APC.

**SUPPLEMENTAL TABLE 4** Cancer Incidence Rates and APC of Rates in Children and Adolescents (Ages 0–19 Years) by Region and by Race or Ethnicity, United States, 2001–2009

|           | White        |                   |                               | African American |                   |                               |
|-----------|--------------|-------------------|-------------------------------|------------------|-------------------|-------------------------------|
|           | Count        | Rate <sup>a</sup> | APC <sup>b</sup> (95% CI)     | Count            | Rate <sup>a</sup> | APC <sup>b</sup> (95% CI)     |
| Total     | 97 765       | 177.91            | 0.0 (–0.5 to 0.5)             | 13 779           | 127.29            | 1.3 (0.2 to 2.5) <sup>c</sup> |
| Northeast | 19 148       | 189.93            | 0.1 (–0.5 to 0.8)             | 2859             | 135.88            | 0.5 (–0.5 to 1.5)             |
| Midwest   | 23 857       | 174.84            | 0.1 (–0.4 to 0.6)             | 2839             | 124.09            | 0.1 (–2.3 to 2.6)             |
| South     | 29 430       | 174.72            | 0.0 (–0.7 to 0.7)             | 6766             | 129.18            | 2.6 (1.3 to 3.8) <sup>c</sup> |
| West      | 25 330       | 176.34            | –0.1 (–1.1 to 1.0)            | 1315             | 109.97            | –0.4 (–2.2 to 1.5)            |
|           | Non-Hispanic |                   |                               | Hispanic         |                   |                               |
|           | Count        | Rate <sup>a</sup> | APC <sup>b</sup> (95% CI)     | Count            | Rate <sup>a</sup> | APC <sup>b</sup> (95% CI)     |
| Total     | 95 716       | 171.66            | 0.3 (–0.2 to 0.7)             | 24 421           | 168.94            | 0.6 (0.0 to 1.3)              |
| Northeast | 20 452       | 185.16            | 0.2 (–0.6 to 1.1)             | 3247             | 170.86            | 0.3 (–1.3 to 2.0)             |
| Midwest   | 25 952       | 171.57            | 0.3 (–0.5 to 1.0)             | 2304             | 162.76            | 0.9 (–1.6 to 3.5)             |
| South     | 29 692       | 162.39            | 0.7 (0.0 to 1.5) <sup>c</sup> | 8281             | 177.72            | –0.3 (–1.1 to 0.5)            |
| West      | 19 620       | 173.62            | –0.3 (–1.3 to 0.7)            | 10 589           | 163.47            | 1.3 (0.1 to 2.5) <sup>c</sup> |

<sup>a</sup> Rates are per million and were age-adjusted to the 2000 US standard population (19 age groups, Census P25-1130) standard. Rate statistics were not displayed if case count was <16 cases.

<sup>b</sup> APCs were calculated by using weighted least squares method. Statistical significance was determined if the 95% CI of APC did not include zero ( $P < .05$ ). APC was not calculated if case count was <16 cases in any 1 year. Some significant values appear to include zero because APC was rounded to the nearest 10th.

<sup>c</sup> Denotes significant APC.
